# Supplementary material
Source: publisher site journal article supplement (https://www.dovepress.com/article/281041)
Supplement: Supplementary file 1 [file get_supplementary_file.php]

**Supplemental Table S1.** Regimens of the intravenous patient controlled analgesia with basal fentanyl infusion

| Department & Type of surgery | | Patient's age | | |
| --- | --- | --- | --- | --- |
| < 60 | 60 - 70 | ≥ 71 |
| General surgery | Major | Fentanyl 25 mcg/ml (1-1-15) | Fentanyl 20 mcg/ml (1-1-15) | Fentanyl 15 mcg/ml (1-1-15) |
| Minor | Fentanyl 15 mcg/ml (1-1-15) | Fentanyl 15 mcg/ml (1-1-15) | Fentanyl 10 mcg/ml (1-1-15) |
| Kidney transplantation | Fentanyl 20 mcg/ml (1-1-15) | Fentanyl 18 mcg/ml (1-1-15) | Fentanyl 15 mcg/ml (1-1-15) |
| Thoracic surgery | Major | Fentanyl 20 mcg/ml (1-1-10) | | Fentanyl 15 mcg/ml (1-1-15) |
| Minor | Fentanyl 15 mcg/ml (1-1-10) | | Fentanyl 10 mcg/ml (1-1-15) |
| Urologic surgery | | Fentanyl 20 mcg/ml (1-1-15) | | Fentanyl 20 mcg/ml (1-1-15) |
| Plastic surgery | | Fentanyl 10 mcg/ml (1-1-15) | | |

The values are presented as the concentration of fentanyl (bolus volume [ml] – basal rate [ml/hr] – lockout time [min]).
